# Supplementary material for: Mutual exclusivity analysis identifies oncogenic network modules
Source: HighWire-hosted journal article supplement (doi:10.1101/gr.125567.111), 2011-09-09
Supplement: Suppl.Table.xlsx [file Suppl.Table.xlsx]

## Sheet: GBM (HRN1)
	Module ID	Genes	Total Percent Altered Cases	p-value	p*-value
	M1	RB1, CDK4, CDKN2A	0.6812	< 1E-4	< 1E-2
	M2	RB1, CDK4, CDKN2B	0.7319	< 1E-4	< 1E-2
	M3	CDK4, TP53, CDKN2A	0.7826	< 1E-4	< 1E-2
	M4	MDM2, TP53, CDKN2A	0.7464	0.0002	< 1E-2
	M5	MDM4, MDM2, TP53	0.4783	0.0002	< 1E-2
	M6	PDGFRA, PTEN, EGFR	0.7391	0.003	0.01
	M7	PIK3R1, PTEN, EGFR	0.7319	0.0039	0.01
	M8	RB1, MDM2, CDKN2A	0.6087	0.0076	0.03
	M9	PIK3R1, PDGFRA, PTEN	0.4855	0.0835	0.38
	M10	GLI1, RB1, EGFR	0.5725	0.0941	0.42
	M11	MDM4, CDK4, TP53	0.4783	0.1481	0.45
	M12	MDM4, RB1, CDK4	0.2899	0.4244	0.83
	M13	MDM4, RB1, MDM2	0.2464	0.6399	0.91
	M14	MDM4, MDM2, PTEN	0.442	0.7208	0.94
	M15	GLI1, RB1, MDM2	0.2536	0.8728	0.94
	Jaccard > .02

## Sheet: OVCA (HRN1)
	Module ID	Genes	Total Percent Altered Cases	p-value	q-value
	M1	RBBP8, BRCA2, RB1, BRCA1, CCNE1	0.4937	0	< 1E-2
	M2	RBBP8, RB1, CCNE1, MYC	0.5475	0.0005	< 1E-2
	M3	RNF144B, BRCA2, CCNE1	0.3481	0.0006	< 1E-2
	M4	PA2G4, RB1, BRCA1, CCNE1	0.3987	0.0207	0.25
	M5	RBBP8, BRCA1, GAB2	0.2532	0.0347	0.43
	M6	RBBP8, BRCA2, BRCA1, MECOM	0.4019	0.0455	0.47
	M7	BRCA1, GAB2, PTEN	0.2753	0.0663	0.57
	M8	CSNK2A1, BRCA1, CCNE1	0.3228	0.0835	0.68
	M9	RBBP8, BRCA2, NF1, BRCA1	0.307	0.0983	0.71
	M10	GAB2, PTEN, FRS2	0.212	0.2	0.93
	M11	BCL2L1, PTEN, BRCA1, GAB2	0.3038	0.2257	0.95
	M12	ERBB3, PPP2R2A, NF1	0.1835	0.2443	0.96
	M13	ERBB3, PPP2R2A, MYC	0.3703	0.2764	0.99
	M14	CSNK2A1, BCL2L1, PTEN, RB1, BRCA1	0.3196	0.3542	1
	M15	RBBP8, GAB2, MYC	0.4051	0.3545	1
	M16	BRCA1, BCL2L1, PTEN, RB1	0.2943	0.3981	1
	M17	BRCA1, RB1, PA2G4	0.2342	0.4062	1
	M18	BRCA1, NF1, BRCA2	0.269	0.4362	1
	M19	PTEN, FRS2, NF1	0.193	0.4978	1
	M20	RIT1, BRCA2, MECOM	0.3291	0.5014	1
	M21	PTEN, GAB2, MYC	0.4177	0.5238	1
	M22	PTEN, NF1, BRCA1	0.25	0.5386	1
	M23	CSNK2A1, BCL2L1, PTEN, RB1, MYC	0.4557	0.55	1
	M24	PA2G4, PTEN, RB1, BRCA1	0.2816	0.5728	1
	M25	PA2G4, RBBP8, RB1, BRCA1	0.2595	0.5772	1
	M26	MYC, BCL2L1, PTEN, RB1	0.4367	0.6072	1
	M27	MYC, PTEN, RB1	0.4114	0.6338	1
	M28	FRS2, BCL2L1, PTEN, GAB2	0.2405	0.6403	1
	M29	ERBB3, GAB2, MYC	0.3956	0.7823	1
	M30	BRCA1, PTEN, RB1	0.25	0.8273	1
	M31	FRS2, ERBB3, PTEN, NF1	0.2184	0.8307	1
	M32	BCL2L1, GAB2, MYC	0.3956	0.8664	1
	M33	FRS2, ERBB3, PTEN, GAB2	0.2278	0.9052	1
	Jaccard > .02

## Sheet: GBM (HRN2)
	Module ID	Genes	Total Percent Altered Cases	p-value	q-value
	M1	GLI1, TP53, CDKN2A	0.7319	<1E-4	<1E-2
	M2	MDM2, TP53, CDKN2A	0.7464	<1E-4	<1E-2
	M3	MDM2, TP53, CDKN2B	0.7971	<1E-4	<1E-2
	M4	CDK4, TP53, CDKN2A	0.7826	<1E-4	<1E-2
	M5	RB1, CDK4, CDKN2A	0.6812	<1E-4	<1E-2
	M6	CDK4, TP53, CDKN2B	0.8333	<1E-4	<1E-2
	M7	RB1, CDK4, CDKN2B	0.7319	<1E-4	<1E-2
	M8	MDM4, MDM2, TP53	0.4783	0.0002	<1E-2
	M9	PDGFRA, NF1, EGFR	0.6522	0.0005	<1E-2
	M10	PDGFRA, PTEN, EGFR	0.7391	0.0011	0.03
	M11	PIK3R1, PTEN, EGFR	0.7319	0.0018	0.03
	M12	GLI1, TP53, EGFR	0.7174	0.0019	0.03
	M13	RB1, MDM2, NF1, CDKN2B	0.7246	0.0037	0.05
	M14	GLI1, RB1, MDM2, CDKN2A	0.6449	0.0044	0.05
	M15	MDM2, PIK3R1, NF1	0.3478	0.0385	0.23
	M16	PIK3R1, PTEN, CDKN2A	0.7029	0.0423	0.24
	M17	GLI1, MDM2, TP53	0.471	0.0426	0.26
	M18	GLI1, RB1, EGFR	0.5725	0.0675	0.38
	M19	PIK3R1, PDGFRA, PTEN	0.4855	0.07	0.38
	M20	MDM4, CDK4, TP53	0.4783	0.1149	0.5
	M21	PIK3R1, MDM2, TP53, PTEN	0.6522	0.2317	0.78
	M22	PIK3R1, MDM2, CDKN2A	0.5652	0.3156	0.82
	M23	PIK3R1, PDGFRA, NF1	0.3188	0.3605	0.82
	M24	PIK3R1, RB1, MDM2, NF1	0.3986	0.3812	0.82
	M25	MDM2, PTEN, TP53	0.6087	0.3835	0.82
	M26	MDM4, RB1, CDK4	0.2899	0.3969	0.82
	M27	PIK3R1, RB1, CDK4	0.3116	0.5697	0.82
	M28	MDM2, RB1, NF1	0.3261	0.747	0.83
	M29	MDM4, RB1, MDM2, NF1	0.3551	0.8063	0.86
	Jaccard > .02

## Sheet: OVCA (HRN2)
	Module ID	Genes	Total Percent Altered Cases	p-value	q-value
	M1	RBBP8, BRCA2, RB1, BRCA1, CCNE1	0.4937	0.0001	0.01
	M2	RBBP8, BRCA2, RB1, CCNE1, MYC	0.5981	0.0007	0.05
	M3	CSNK2A1, BRCA2, BRCA1, CCNE1	0.4051	0.0024	0.13
	M4	GAB2, KRAS, NF1	0.307	0.012	0.31
	M5	RBBP8, NF1, RB1, BRCA1, CCNE1	0.4652	0.0267	0.52
	M6	BRCA1, CCNE1, RB1	0.3797	0.0321	0.67
	M7	BRCA1, BCL2L1, BRCA2	0.2468	0.0329	0.68
	M8	NF1, KRAS, MYC	0.4557	0.0626	0.89
	M9	PTEN, KRAS, MYC	0.4399	0.0674	0.91
	M10	PA2G4, RB1, BRCA1, CCNE1	0.3987	0.0829	0.91
	M11	ERBB3, RB1, BRCA1, CCNE1	0.4019	0.0952	0.95
	M12	RB1, KRAS, MYC	0.4589	0.0972	0.95
	M13	CSNK2A1, BCL2L1, BRCA2, BRCA1	0.2722	0.1028	0.95
	M14	FRS2, PPP2R2A, PTEN, NF1, GAB2	0.3291	0.1175	0.95
	M15	GAB2, FRS2, PTEN, WNK1	0.2848	0.1647	0.97
	M16	BRCA1, GAB2, NF1	0.2943	0.1651	0.97
	M17	BRCA1, CCNE1, CSNK2A1	0.3228	0.1692	0.97
	M18	NF1, RB1, GAB2, KRAS	0.3703	0.18	0.98
	M19	FRS2, PTEN, NF1, GAB2, KRAS	0.3703	0.1824	0.98
	M20	KRAS, RB1, NF1	0.2911	0.1854	0.98
	M21	GAB2, FRS2, CACNA1A	0.2627	0.1935	0.99
	M22	CSNK2A1, ERBB3, BCL2L1, BRCA1	0.2278	0.2059	0.99
	M23	GAB2, PTEN, KRAS, NF1	0.3449	0.2208	0.99
	M24	BRCA1, RB1, BRCA2	0.2848	0.2321	0.99
	M25	CSNK2A1, BRCA2, RB1, BRCA1	0.3101	0.2651	1
	M26	BRCA1, BCL2L1, ERBB3	0.1962	0.2735	1
	M27	GAB2, PTEN, PPP2R2A, NF1	0.2975	0.2802	1
	M28	GAB2, PTEN, PPP2R2A, FRS2, WNK1	0.3165	0.2827	1
	M29	GAB2, FRS2, PTEN	0.212	0.3095	1
	M30	BRCA1, CCNE1, ERBB3	0.3228	0.3309	1
	M31	GAB2, PTEN, NF1	0.2595	0.3503	1
	M32	CSNK2A1, PA2G4, RB1, BRCA1	0.2658	0.3529	1
	M33	CSNK2A1, PA2G4, BRCA1, CCNE1	0.3418	0.3818	1
	M34	CSNK2A1, ERBB3, RB1, BRCA1	0.269	0.4183	1
	M35	CSNK2A1, ERBB3, BRCA1, CCNE1	0.3449	0.4219	1
	M36	FRS2, BCL2L1, PPP2R2A, PTEN, WNK1, GAB2	0.3449	0.4393	1
	M37	GAB2, PTEN, WNK1	0.25	0.4643	1
	M38	FRS2, BCL2L1, PTEN, MYC	0.4082	0.4809	1
	M39	RBBP8, NF1, MYC	0.3956	0.5364	1
	M40	FRS2, PTEN, GAB2, MYC	0.443	0.5472	1
	M41	BRCA1, RB1, PA2G4	0.2342	0.5472	1
	M42	GAB2, RB1, NF1	0.2816	0.5785	1
	M43	GAB2, KRAS, CACNA1A	0.3101	0.5843	1
	M44	PTEN, NF1, RB1, KRAS	0.3291	0.6244	1
	M45	BRCA1, RB1, ERBB3	0.2373	0.6344	1
	M46	BRCA1, GAB2, BCL2L1	0.2468	0.6515	1
	M47	MYC, BCL2L1, PTEN	0.3829	0.654	1
	M48	FRS2, GAB2, KRAS, CACNA1A	0.3323	0.6578	1
	M49	GAB2, KRAS, RB1	0.2911	0.678	1
	M50	BCL2L1, BRCA2, MYC	0.3956	0.6803	1
	M51	FRS2, NF1, GAB2, MYC	0.4525	0.6827	1
	M52	MYC, RB1, PA2G4	0.3956	0.7023	1
	M53	MYC, RB1, ERBB3	0.3987	0.72	1
	M54	MYC, GAB2, PTEN	0.4177	0.7383	1
	M55	CSNK2A1, PA2G4, RB1, MYC	0.4146	0.7423	1
	M56	CSNK2A1, ERBB3, RB1, MYC	0.4177	0.7478	1
	M57	FRS2, CSNK2A1, ERBB3, BCL2L1, MYC	0.4051	0.7488	1
	M58	ERBB3, BCL2L1, BRCA1, GAB2	0.2753	0.7489	1
	M59	FRS2, PTEN, NF1, MYC	0.4272	0.7629	1
	M60	GAB2, PTEN, KRAS	0.2627	0.7755	1
	M61	CSNK2A1, PPP2R2A, CEP72	0.1329	0.7843	1
	M62	GAB2, BCL2L1, PTEN, FRS2	0.2405	0.795	1
	M63	MYC, BCL2L1, CSNK2A1, ERBB3	0.3829	0.8046	1
	M64	PTEN, RB1, MYC	0.4114	0.8086	1
	M65	ERBB3, RB1, BRCA1, GAB2	0.3133	0.8126	1
	M66	NF1, RB1, BRCA1, GAB2	0.3481	0.813	1
	M67	PTEN, NF1, RB1, GAB2	0.3228	0.8172	1
	M68	PTEN, KRAS, RB1	0.2563	0.8184	1
	M69	MYC, GAB2, FRS2	0.3956	0.8291	1
	M70	FRS2, ERBB3, GAB2, CACNA1A	0.2785	0.8322	1
	M71	BCL2L1, PTEN, KRAS	0.212	0.8376	1
	M72	MYC, BCL2L1, ERBB3	0.3608	0.8428	1
	M73	MYC, GAB2, BCL2L1, FRS2	0.4209	0.8492	1
	M74	MYC, GAB2, NF1	0.4272	0.8531	1
	M75	ERBB3, RB1, GAB2, KRAS	0.3133	0.8691	1
	M76	RBBP8, BRCA1, RB1, NF1	0.2975	0.8725	1
	M77	GAB2, FRS2, KRAS	0.2342	0.8782	1
	M78	FRS2, CSNK2A1, BCL2L1, PPP2R2A	0.1582	0.8897	1
	M79	BRCA1, GAB2, RB1	0.2816	0.895	1
	M80	PA2G4, RBBP8, NF1, RB1, BRCA1	0.3196	0.8952	1
	M81	MYC, PTEN, NF1	0.4019	0.8956	1
	M82	FRS2, ERBB3, BCL2L1, GAB2, MYC	0.4399	0.8993	1
	M83	PTEN, RB1, GAB2, KRAS	0.3291	0.9075	1
	M84	ERBB3, PTEN, RB1, KRAS	0.2816	0.9098	1
	M85	FRS2, BCL2L1, PTEN, GAB2, KRAS	0.3133	0.9233	1
	M86	BCL2L1, PPP2R2A, CSNK2A1	0.1266	0.9269	1
	M87	GAB2, BCL2L1, PTEN, KRAS	0.288	0.9486	1
	M88	GAB2, PTEN, RB1	0.25	0.9528	1
	M89	BCL2L1, PTEN, KRAS, ERBB3	0.2373	0.9566	1
	M90	KRAS, ERBB3, CACNA1A	0.2468	0.9578	1
	M91	BRCA1, RB1, NF1	0.2627	0.9786	1
	M92	FRS2, ERBB3, BCL2L1, PTEN, KRAS	0.2595	0.9807	1
	M93	FRS2, RIT1, KRAS	0.1867	0.9836	1
	M94	FRS2, ERBB3, KRAS, CACNA1A	0.2658	0.9892	1
	M95	FRS2, ERBB3, BCL2L1, PTEN, GAB2	0.2563	0.9898	1
	M96	ERBB3, PTEN, RB1, GAB2	0.2722	0.9899	1
	M97	FRS2, ERBB3, GAB2, KRAS	0.2532	0.9905	1
